# Supplementary figures and images for: Studying Ni(II) Adsorption of Magnetite/Graphene Oxide/Chitosan Nanocomposite
Source: Hindawi journal article supplement (doi:10.1155/2019/8124351), 2019-08-01

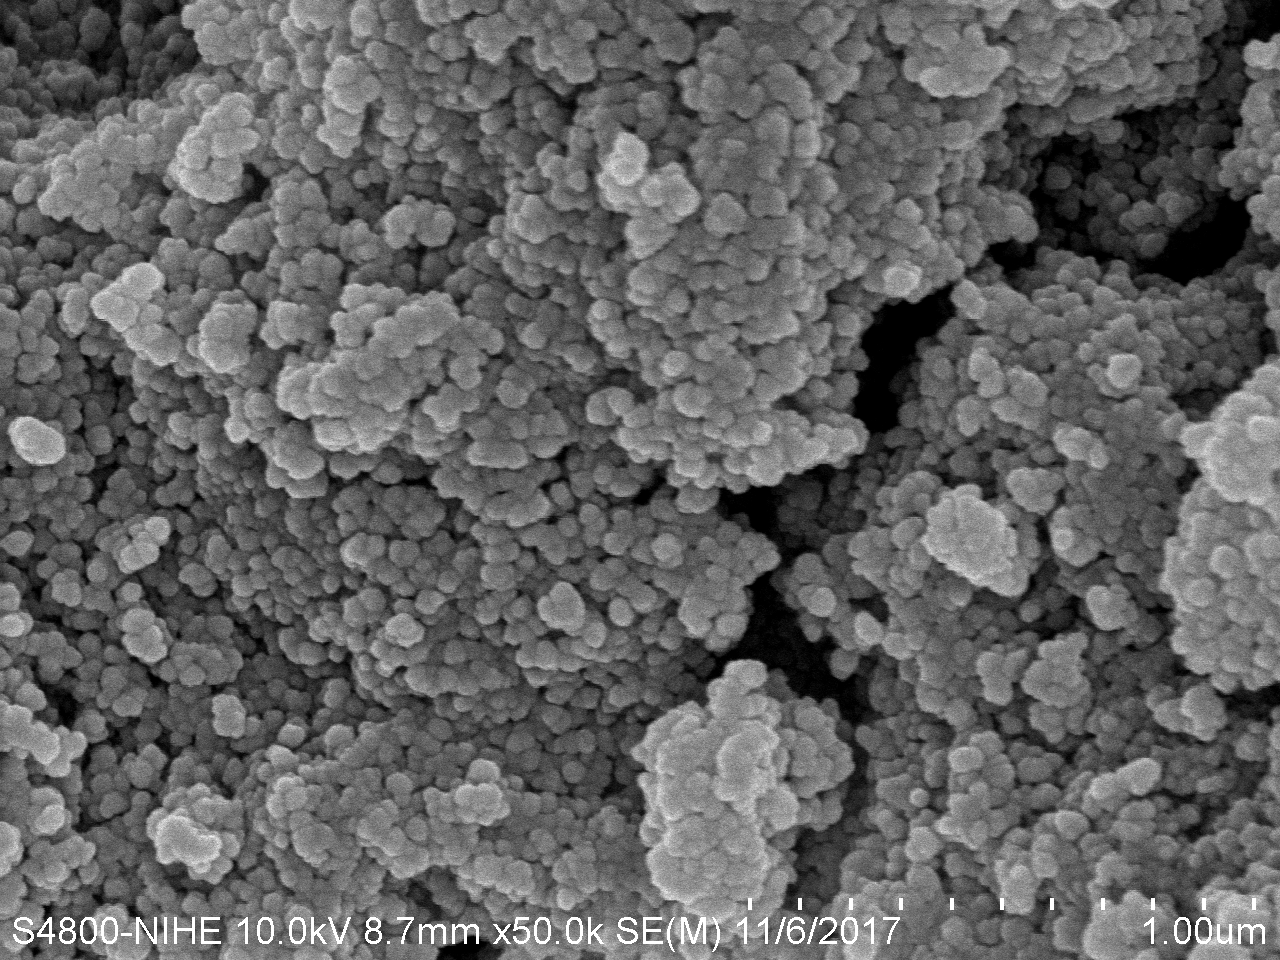


**Figure 7a.**

**
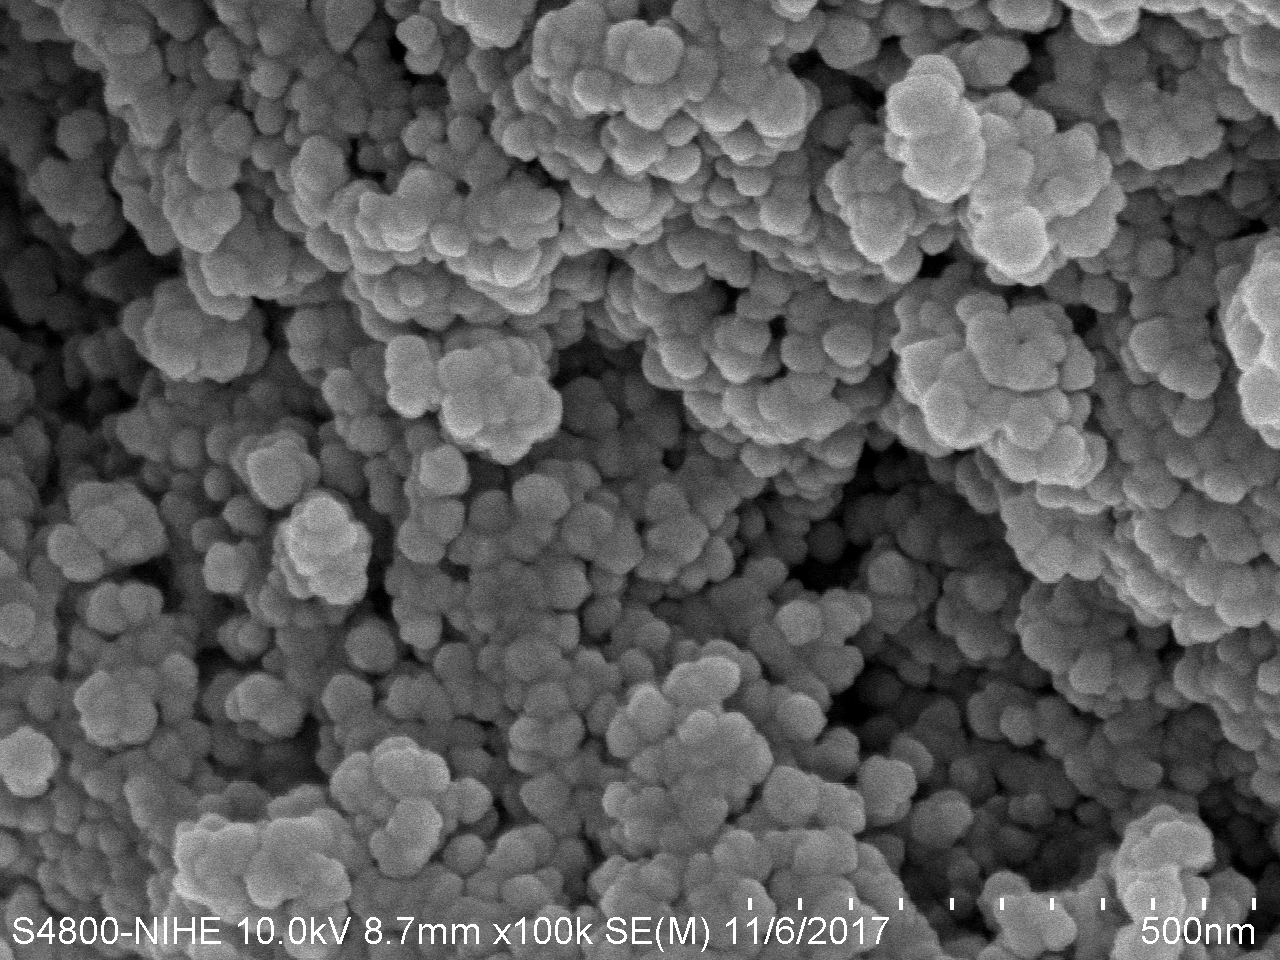
**

**Figure 7b.**

**
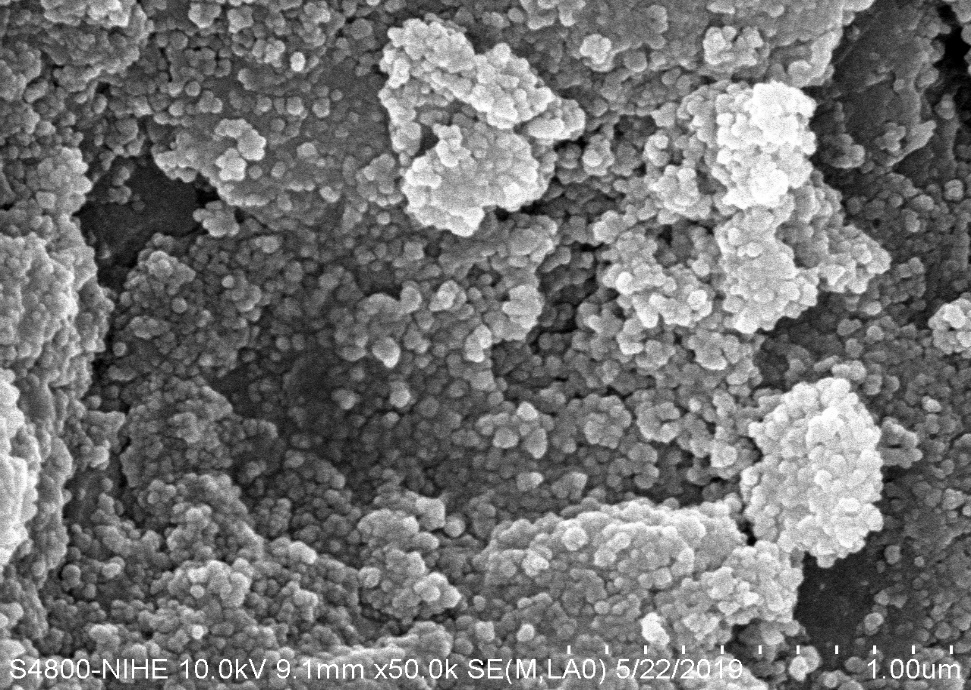
**

**Figure 7c.**

**
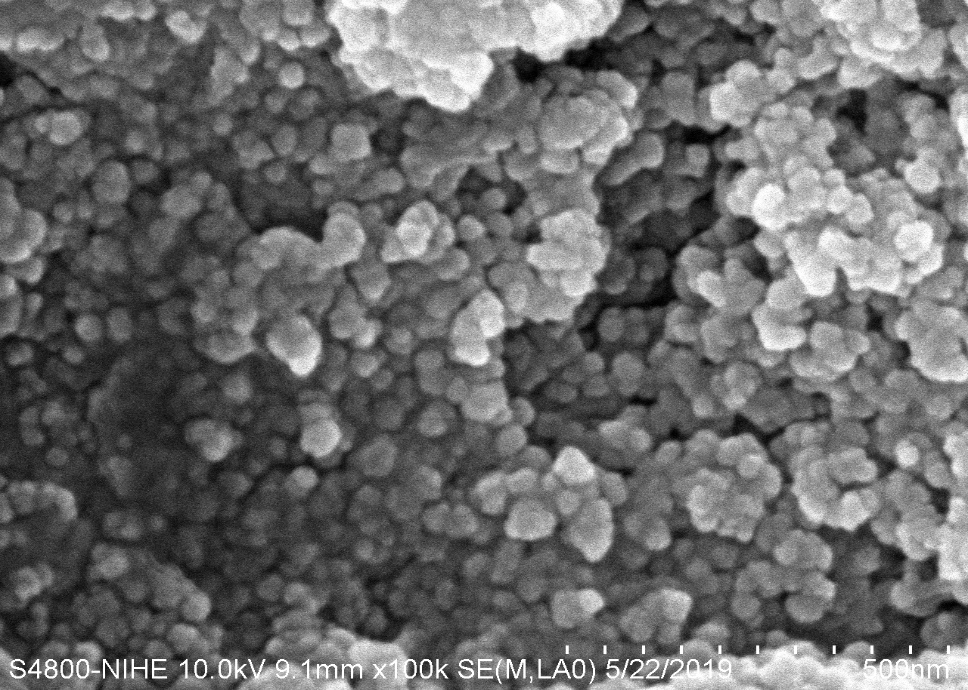
**

**Figure 7d.**

Supplement: f1 [file 8124351.f1.docx]
